# Supplementary material for: Rapid uniaxial actuation of layered bacterial cellulose/poly(N-isopropylacrylamide) composite hydrogel with high mechanical strength
Source: Royal Society of Chemistry journal article supplement (doi:10.1039/c8ra01639a), 2018-01-01
Supplement: c8ra01639a1.pdf [file c8ra01639a1.pdf]

## Supporting information

### **Rapid uniaxial actuation of layered bacterial cellulose/ poly(*N*-isopropylacrylamide) composite hydrogel with high mechanical strength**

*Qidong Wang, Taka-Aki Asoh, and Hiroshi Uyama\**

Department of Applied Chemistry, Graduate School of Engineering, Osaka  
University

2-1 Yamadaoka, Suita, Osaka 565-0871, JAPAN

Phone: +81-6-6879-7364, Fax: +81-6-6879-7367

e-mail: [uyama@chem.eng.osaka-u.ac.jp](mailto:uyama@chem.eng.osaka-u.ac.jp)

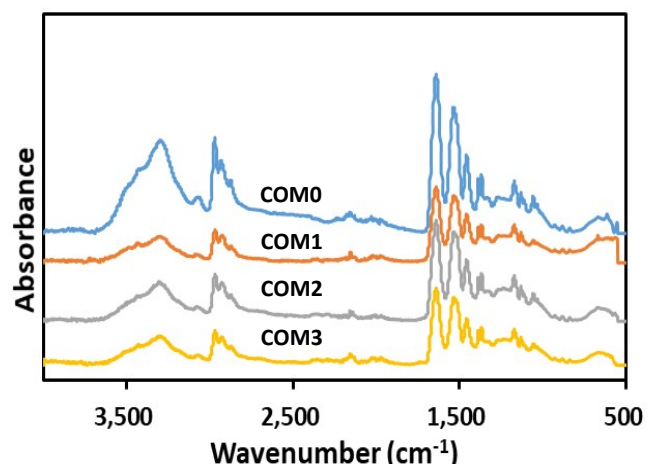

**Fig. S1** FT-IR spectra of BC/PNIPAAm hydrogel with different MDI ratios.

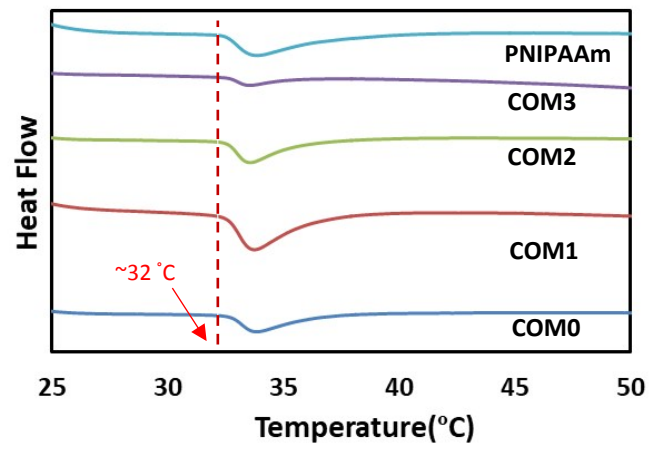

Fig. S2 DSC traces of swollen hydrogel samples

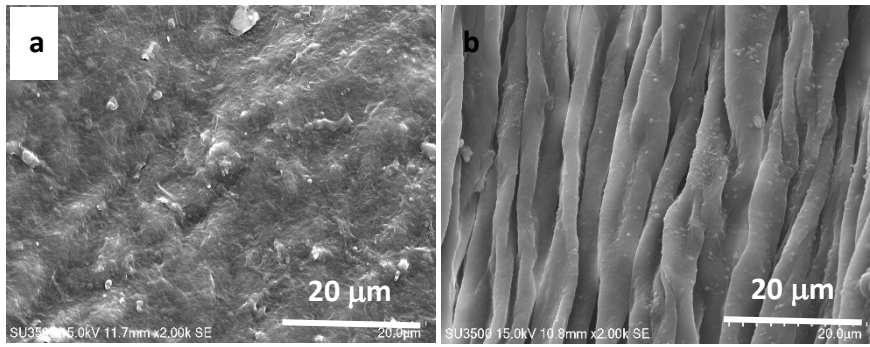

**Fig. S3** SEM images of dried COM3: (a) horizontal and (b) vertical images are on the left and right columns, respectively.
